# Supplementary material for: Thymidylate synthase maintains the de-differentiated state of triple negative breast cancers
Source: PubMed Central journal article supplement (PMC6888897; doi:10.1038/s41418-019-0289-6), 2019-02-08
Supplement: 41418_2019_289_MOESM6_ESM.pdf [file 41418_2019_289_MOESM6_ESM.pdf]

Supplementary Table - 1

| <b>SYMBOL</b>  | <b>CDH1</b> | <b>VIM</b> | <b>ratio</b> | <b>TYMS</b> |
|----------------|-------------|------------|--------------|-------------|
| MCF7           | 218.67      | 1.67       | 0.007637     | 27.17       |
| HCC1428        | 173         | 1.47       | 0.008497     | 35.04       |
| BT-483         | 217.85      | 2.21       | 0.010145     | 8.42        |
| MDA-MB-175-VII | 196.32      | 2.22       | 0.011308     | 16.32       |
| T-47D          | 125.64      | 1.48       | 0.01178      | 25.26       |
| UACC-893       | 160         | 1.9        | 0.011875     | 50.97       |
| KPL-1          | 168.68      | 2.8        | 0.016599     | 28.58       |
| HCC202         | 129.66      | 2.9        | 0.022366     | 37.95       |
| BT-20          | 182.34      | 4.2        | 0.023034     | 58.37       |
| HCC1419        | 74.12       | 1.87       | 0.025229     | 35.84       |
| HCC1937        | 108.31      | 3.08       | 0.028437     | 52.08       |
| MDA-MB-415     | 117.31      | 3.62       | 0.030858     | 21.6        |
| EFM-192A       | 144.81      | 6.37       | 0.043989     | 34.48       |
| HCC1806        | 41.61       | 1.9        | 0.045662     | 34.03       |
| EFM-19         | 92.39       | 4.61       | 0.049897     | 19.15       |
| CAL-148        | 57.64       | 2.95       | 0.05118      | 33.66       |
| DU4475         | 23.29       | 1.2        | 0.051524     | 44.27       |
| CAL-85-1       | 162.55      | 10.86      | 0.06681      | 93.43       |
| JIMT-1         | 53.86       | 3.68       | 0.068325     | 59.23       |
| UACC-812       | 106.19      | 8.46       | 0.079669     | 26.11       |
| HCC70          | 159.03      | 16.66      | 0.10476      | 34.24       |
| ZR-75-1        | 87.26       | 9.18       | 0.105203     | 39.68       |
| BT-474         | 161.19      | 16.99      | 0.105404     | 54.66       |
| MDA-MB-453     | 9.76        | 1.07       | 0.109631     | 27.64       |
| CAMA-1         | 21.21       | 2.37       | 0.11174      | 35.86       |
| HCC1954        | 152.19      | 21.07      | 0.138445     | 29.55       |
| HCC2218        | 8.58        | 1.63       | 0.189977     | 16.35       |
| MDA-MB-468     | 27.59       | 12.47      | 0.451975     | 93.8        |
| ZR-75-30       | 3.45        | 3.94       | 1.142029     | 17.42       |
| MDA-MB-134-VI  | 5.31        | 6.12       | 1.152542     | 17.56       |
| MDA-MB-361     | 210.5       | 250.84     | 1.191639     | 38.17       |
| HCC1599        | 33.04       | 45.93      | 1.390133     | 59.18       |
| HCC1187        | 27.52       | 40.91      | 1.486555     | 50.44       |
| HCC38          | 45.74       | 98.84      | 2.160909     | 30.26       |
| CAL-51         | 12.49       | 56.92      | 4.557246     | 78.29       |
| HCC1143        | 79.47       | 506.06     | 6.367938     | 103.97      |
| HCC2157        | 50.98       | 419.13     | 8.221459     | 32.03       |
| SK-BR-3        | 0.18        | 2.89       | 16.05556     | 46.68       |
| AU565          | 0.09        | 3.79       | 42.11111     | 42.98       |
| CAL-120        | 8.64        | 1123.38    | 130.0208     | 100.53      |
| BT-549         | 0.46        | 1219.59    | 2651.283     | 72.99       |
| MDA-MB-231     | 0.38        | 1099.13    | 2892.447     | 99.91       |
| MDA-MB-436     | 0.1         | 486.9      | 4869         | 32.4        |
| HS-739.T       | 0.38        | 2685.45    | 7066.974     | 19.22       |
| HS-742.T       | 0.4         | 3303.5     | 8258.75      | 11.2        |
| MDA-MB-157     | 0.17        | 1612.7     | 9486.471     | 128.93      |

|          |      |         |          |        |
|----------|------|---------|----------|--------|
| HS-578T  | 0.33 | 3737.13 | 11324.64 | 30.99  |
| HCC-1359 | 0.24 | 2849.64 | 11873.5  | 127.45 |
| HMC-1-8  | 0.09 | 1120    | 12444.44 | 69.43  |
| HS-343.T | 0.34 | 4752.57 | 13978.15 | 68.27  |
| HS-281.T | 0.3  | 4951.55 | 16505.17 | 44.33  |
| HS-606.T | 0.25 | 4142.49 | 16569.96 | 20.82  |
