# Supplementary material for: Thymidylate synthase maintains the de-differentiated state of triple negative breast cancers
Source: PubMed Central journal article supplement (PMC6888897; doi:10.1038/s41418-019-0289-6), 2019-02-08
Supplement: 41418_2019_289_MOESM7_ESM.pdf [file 41418_2019_289_MOESM7_ESM.pdf]

**Supplementary Table - 2**

|                            | <b>n</b>  |
|----------------------------|-----------|
| <b>All</b>                 | 120       |
| <b>Age (mean, min-max)</b> | 63, 26-92 |
| <b>Grade I, II, III</b>    | 15,44,61  |
| <b>HER2</b>                | 2         |
| <b>Lum A</b>               | 23        |
| <b>Lum B/ HER2 neg</b>     | 35        |
| <b>Lum B/ HER2 pos</b>     | 13        |
| <b>TN</b>                  | 47        |
