# Supplementary material for: Thymidylate synthase maintains the de-differentiated state of triple negative breast cancers
Source: PubMed Central journal article supplement (PMC6888897; doi:10.1038/s41418-019-0289-6), 2019-02-08
Supplement: 41418_2019_289_MOESM8_ESM.pdf [file 41418_2019_289_MOESM8_ESM.pdf]

**Supplementary Table - 3**

**TS (TYMS) knockdown in MDA-MB-231**

| Genes down-regulated upon KD |           | Genes up-regulated upon KD |          |
|------------------------------|-----------|----------------------------|----------|
| ZNF300                       | IL11      | SEMA3E                     | SEL1L3   |
| DOCK3                        | ITGBL1    | EPB41L4A                   | SHISA3   |
| B3GNT7                       | SAA1      | RFPL4A                     | PLD5     |
| MAGEC2                       | LTBP2     | FST                        | CLEC2B   |
| CYP24A1                      | KYNU      | POU3F2                     | TIAM1    |
| LCN2                         | ZNF519    | IFIT2                      | SMAD9    |
| CST1                         | CLMN      | STOM                       | FZD8     |
| COL6A2                       | LIMS2     | CCDC149                    | LOX      |
| IL1A                         | SCN5A     | CSRP2                      | LCP1     |
| PLCB4                        | RCN3      | F2RL2                      | COL1A1   |
| TNFRSF1B                     | TYMS      | CXCR4                      | CXCL11   |
| IL1B                         | HIST1H2BC | BDNF                       | SDPR     |
| EEF1A2                       | VNN1      | APLN                       | OASL     |
| PAPPA                        | DAPK1     | TNFAIP3                    | HMGN5    |
| PMEPA1                       | STC1      | PTGS2                      | UCA1     |
| NAP1L3                       | COL6A1    | PCYOX1L                    | KCNQ3    |
| HIST1H2BN                    | BIN1      | ADAMTS1                    | GSPT2    |
| FAM133A                      | CPM       | PDK3                       | KRBOX1   |
| ZNF542P                      | AFF3      | SPANXC                     | ADGRL3   |
| CST4                         | TUSC3     | EXPH5                      | ATP1A3   |
| VIPR1                        | KCNS3     | PRRG4                      | RGS4     |
| APCDD1L                      | C3        | C14orf37                   | ESM1     |
| TNFRSF11B                    | INHBA     | ST6GAL1                    | BCL11A   |
| TLR2                         | ICAM1     | KITLG                      | NKX2-1   |
| CFAP45                       | MAPK13    | PPARGC1A                   | HS6ST3   |
| SLFN13                       | ICAM2     | NR2F1                      | SERPINB2 |
| SAA2                         | COL27A1   | CRISPLD2                   | ID4      |
| LOC100506178                 | TOX2      | CXADR                      | HSPA12A  |
| LRIG1                        | TATDN1    | IFIT1                      | SCEL     |
| C15orf48                     | TRMT12    | ARRDC4                     | ZNF716   |
| ALDH1A3                      | VDR       | PTN                        | FOXA1    |
| TRIML2                       |           | CELF2                      | FABP5    |
| KISS1                        |           | MMP1                       | IGFBP5   |
| CDA                          |           | HOOK1                      | MCTP2    |
| PDZK1IP1                     |           | PROS1                      | FGF13    |
| COL18A1                      |           | NRK                        | SFTA3    |
| CARD11                       |           | SLAMF7                     | COL1A2   |
| HIST3H2A                     |           | CD24                       | FBXL7    |
| SHISA2                       |           | USP32P2                    | TMPRSS15 |
| TNFSF15                      |           | HCLS1                      | NCAM2    |
| HIST1H3H                     |           | SAMSN1                     | PGM5     |
| SERPINA1                     |           | PCDH7                      | EPB41L3  |
